# Supplementary material for: Identification of Novel Loci and Candidate Genes for Cucumber Downy Mildew Resistance Using GWAS
Source: MDPI journal article supplement (doi:10.3390/plants9121659), 2020-11-27
Supplement: s1 [file s1]

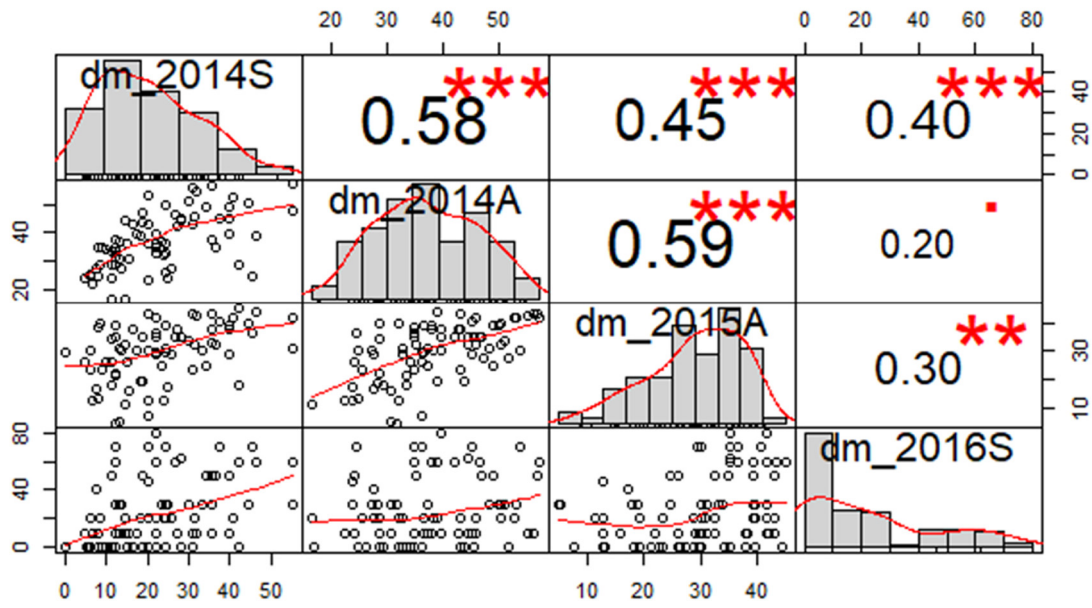

**Figure S1.** Frequency distribution and Spearman rank correlations of mean disease index of the CG lines in four experiments, dm\_2014S, dm\_2014A, dm\_2015A, and dm\_2016S. \*\* and \*\*\* indicate significance at  $p < 0.001$  and  $p < 0.01$ , respectively.

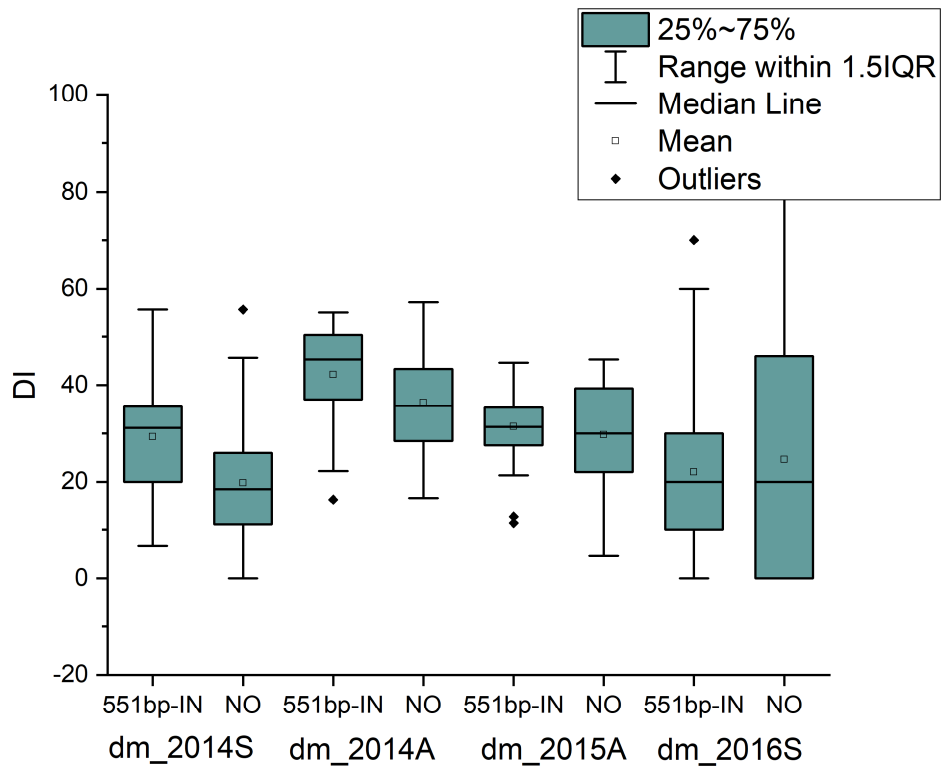

**Figure S2.** Disease index (DI) of four experiments for the CG lines with (551bp-IN) and without (NO) the 551-bp insertion in the RLK (*Receptor-like Kinase*) gene reported by Berg et al. 2020 [11].
