# Supplementary material for: Identification of Novel Loci and Candidate Genes for Cucumber Downy Mildew Resistance Using GWAS
Source: MDPI journal article supplement (doi:10.3390/plants9121659), 2020-11-27
Supplement: s1 [file s1]

**Supplementary file 4.** Comparison of loci identified by GWAS with previously reported QTLs.

| Locus   | SNP name    | Chromosome | SNP Position | Flanking markers | Physical location (Mb) | Reference       |
|---------|-------------|------------|--------------|------------------|------------------------|-----------------|
| dmG-1.1 | SNP31098    | 1          | 2,107,675    | UW044821         | 1.2                    | Zhang et al.    |
|         |             |            |              | SSR05793         | 3.1                    | 2018            |
| dmG-1.2 | SNP187059   | 1          | 10,520,443   | UW084539         | 8.72                   | Zhang et al.    |
|         |             |            |              | SSR16055         | 13.30                  | 2018            |
| dmG-1.3 | SNP293263   | 1          | 16,465,444   | Marker1_15701257 | 15.70                  | Wang et         |
|         |             |            |              | Marker1_26471365 | 26.47                  | al.2018         |
| dmG-1.4 | SNP398090   | 1          | 21,761,223   | Marker1_15701257 | 15.70                  | Wang et         |
|         |             |            |              | Marker1_26471365 | 26.47                  | al.2018         |
| dmG-2.1 | SNP639496   | 2          | 4,618,724    |                  | Novel                  |                 |
| dmG-2.2 | SNP730945   | 2          | 8,449,502    | SSR13532         | 5.64                   | Win et al. 2017 |
|         |             |            |              | SSR13105         | 10.28                  |                 |
| dmG-2.3 | SNP829346   | 2          | 12,989,299   | Marker2_7976333  | 7.97                   | Wang et al.     |
|         |             |            |              | Marker2_12537499 | 12.82                  | 2018            |
| dmG-3.1 | SNP1139014  | 3          | 8,524,603    | SSR16264         | 9.15                   | Win et al. 2017 |
|         |             |            |              | SSR13312         | 10.25                  |                 |
| dmG-4.1 | SNP1793602  | 4          | 5,302,408    | SSR00012         | 4.11                   | Cavagnaro et    |
|         |             |            |              | SSR13159         | 20.10                  | al.2011         |
| dmG-4.2 | SNP1938892  | 4          | 13,242,382   | SSR00012         | 4.11                   | Cavagnaro et    |
|         |             |            |              | SSR13159         | 20.10                  | al.2011         |
| dmG-4.3 | SNP2065096  | 4          | 19,027,366   | SSR00012         | 4.11                   | Cavagnaro et    |
|         |             |            |              | SSR13159         | 20.10                  | al.2011         |
| dmG-5.1 | SNP2452535  | 5          | 18,119,570   | Marker5_16446482 | 16.44                  | Wang et         |
|         |             |            |              | Marker5_18140438 | 18.14                  | al.2018         |
| dmG-5.2 | SNP2531703  | 5          | 22,899,752   | SSR01498         | 22.66                  | Zhang et al.    |
|         |             |            |              | InDel82          | 25.75                  | 2018            |
| dmG-6.1 | SNP13977656 | 6          | 13,977,656   |                  | 5.54                   | Win et al. 2016 |
|         |             |            |              |                  | 17.28                  |                 |
| dmG-6.2 | SNP3104337  | 6          | 25,297,012   | SSR01148         | 25.95                  | Wang et al.     |
|         |             |            |              | SSR05946         | 28.09                  | 2016            |
| dmG-6.3 | SNP3158927  | 6          | 28,650,383   | SSR01148         | 25.95                  | Wang et al.     |
|         |             |            |              | SSR05946         | 28.09                  | 2016            |
| dmG-7.1 | SNP3165616  | 7          | 84,900       |                  | Novel                  |                 |
| dmG-7.2 | SNP3517753  | 7          | 18,251,423   | SSR33278         | 17.52                  | Yoshioka et al. |
|         |             |            |              | SSR477           | 19.19                  | 2014            |
